# Supplementary material for: Encapsulation of 4-oxo-N-(4-hydroxyphenyl) retinamide in human serum albumin nanoparticles promotes EZH2 degradation in preclinical neuroblastoma models
Source: Royal Society of Chemistry journal article supplement (doi:10.1039/d4nr00642a), 2024-01-01
Supplement: d4nr00642a1.pdf [file d4nr00642a1.pdf]

## Encapsulation of 4-Oxo-N-(4-hydroxyphenyl) Retinamide in Human Serum Albumin Nanoparticles Promotes EZH2 Degradation in preclinical Neuroblastoma models

Boddu Mrunalini,<sup>a</sup> Atul Dev,<sup>a</sup> Avinash Chandra Kushwaha,<sup>a</sup> Mohammed Nadim Sardoiwala,<sup>a</sup> and Surajit Karmakar<sup>\*a</sup>

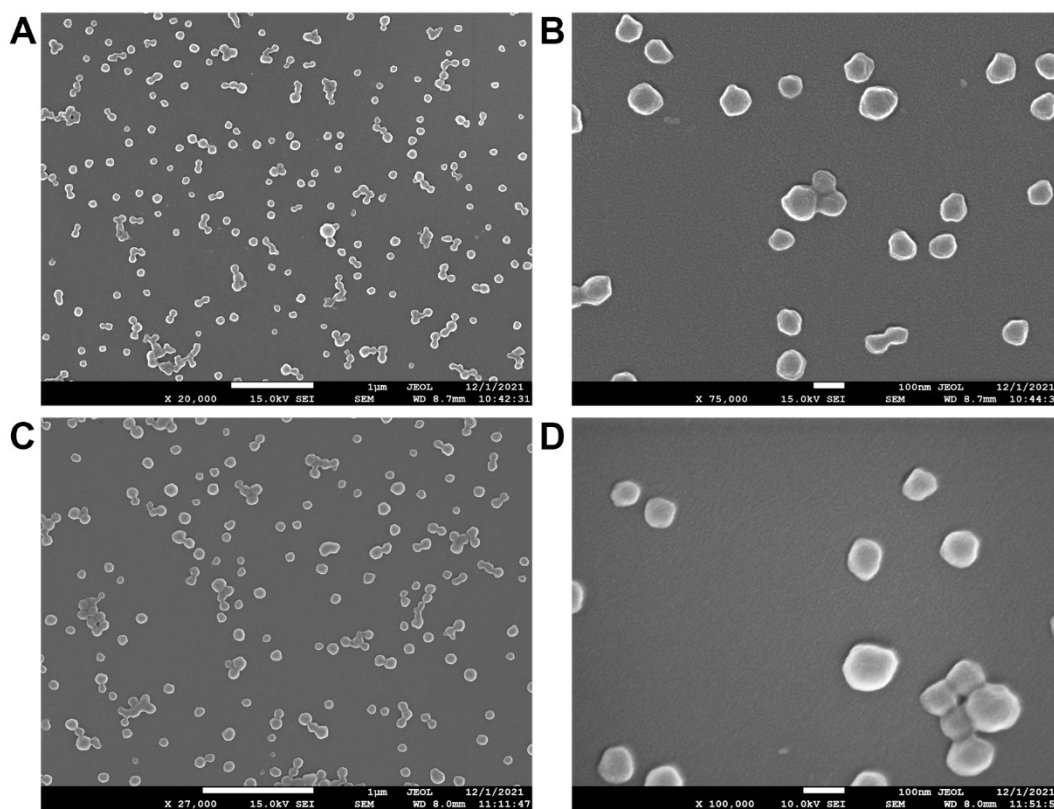

**Figure S1.** Morphological characterization of (a) & (b) HSANPs; (c) & (d) 4O4HPR loaded HSANPs by Field Emission Scanning Electron Microscope showing the spherical morphology of the nanoformulations.

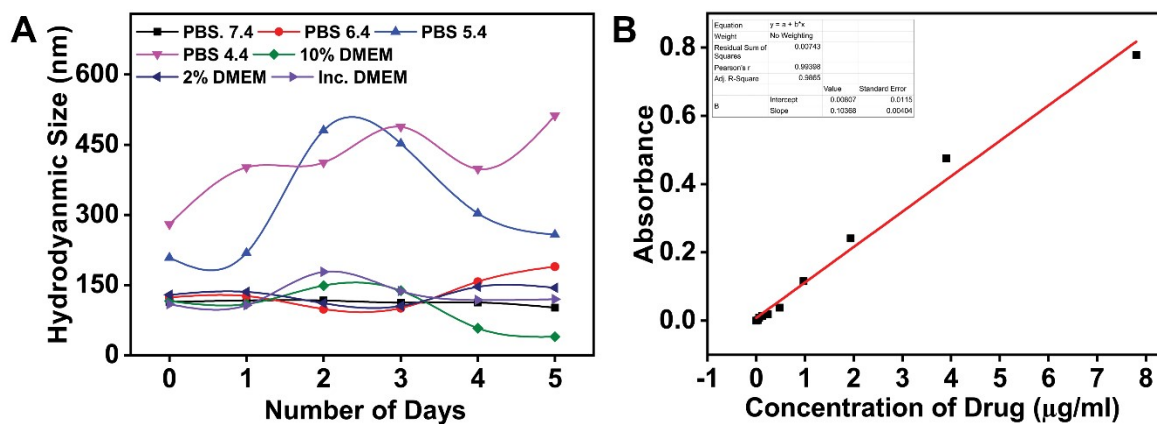

**Figure S2:** (a) Stability profile for hydrodynamic size of 4O4HPR loaded HSANPs in PBS with varying pH 7.4, 6.4, 5.4, 4.4, 10% DMEM, 2% DMEM and Incomplete DMEM; (b) Standard curve of 4O4HPR

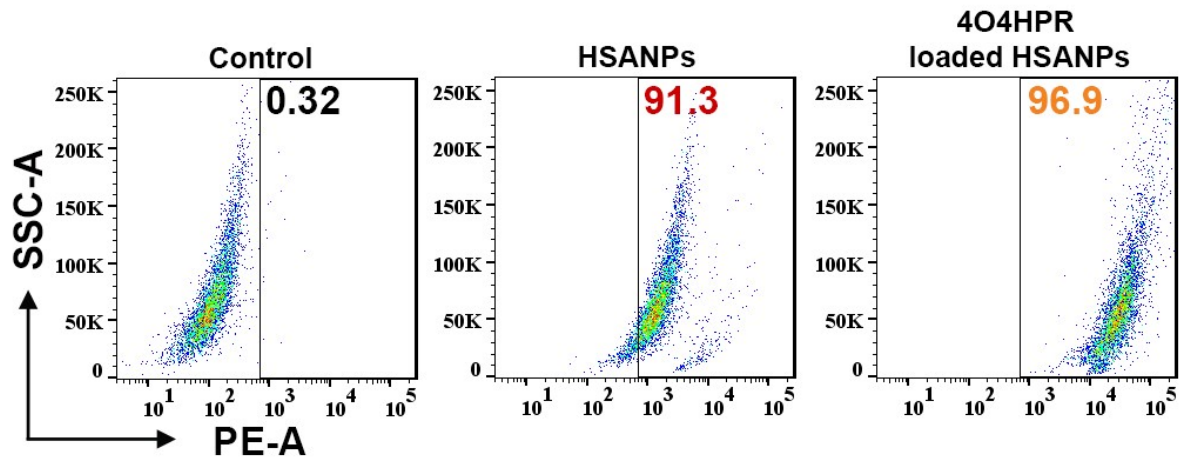

**Figure S3.** Flow cytometric analysis of rhodamine-tagged 4O4HPR loaded HSNPs compared to HSNPs demonstrates the higher uptake percentage of 4O4HPR loaded HSNPs.

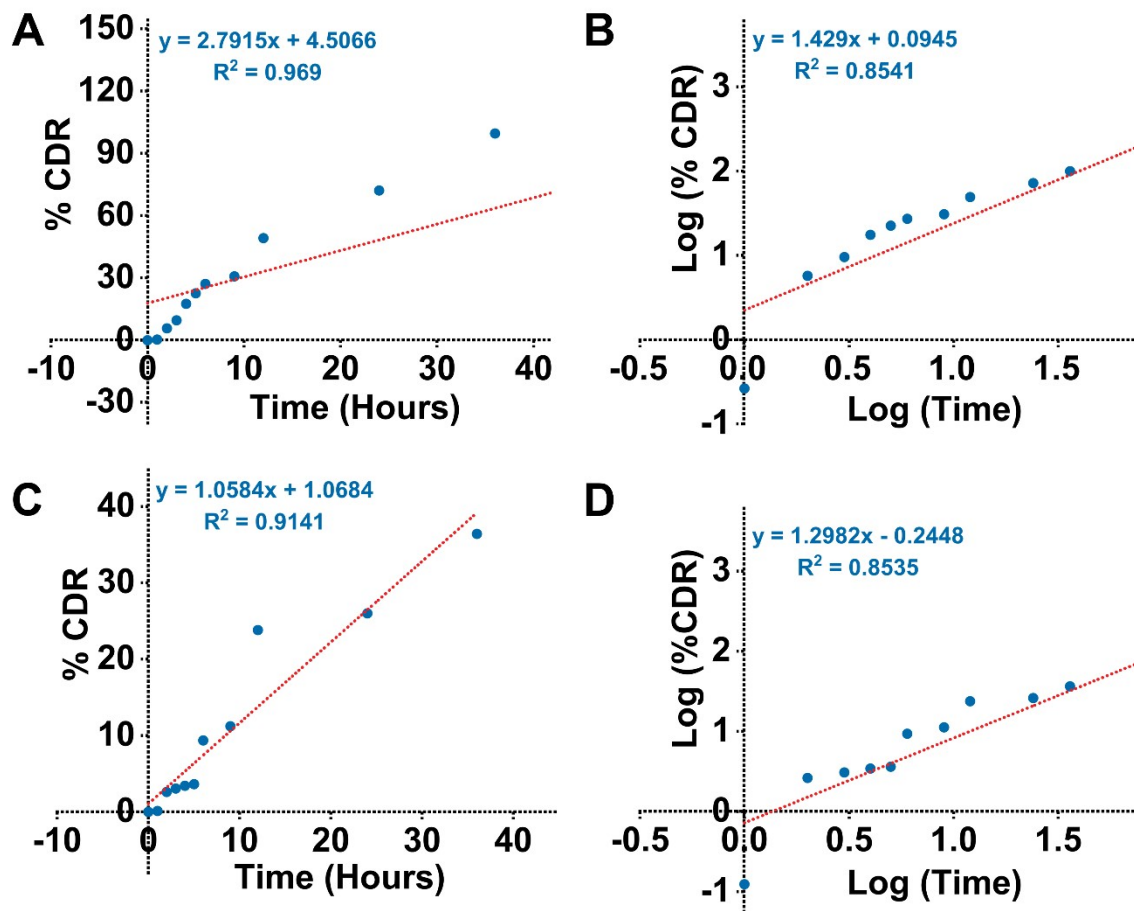

**Figure S4.** Drug release kinetics from (a) & (b) 4O4HPR (c) & (d) 4O4HPR loaded HSNPs in PBS-7.4.

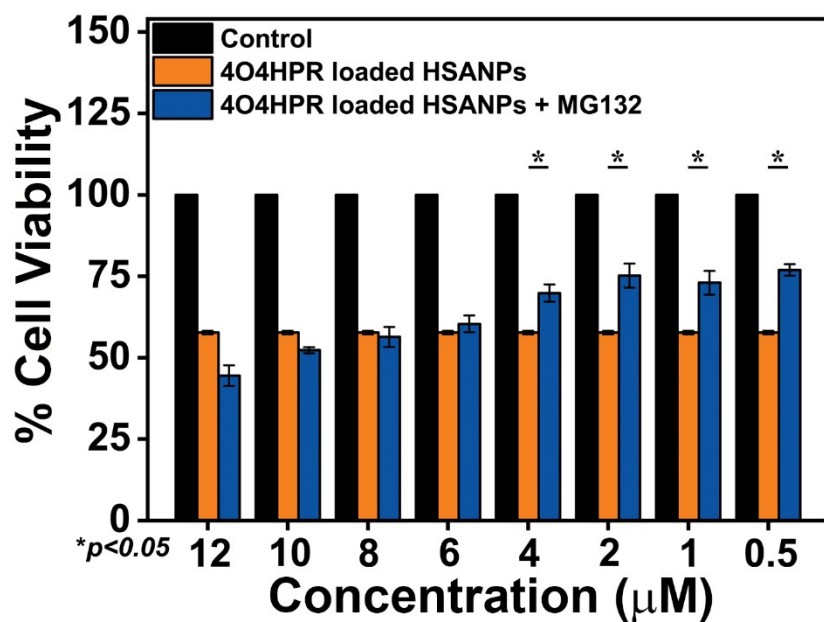

**Figure S5.** Cell viability assay for the dose optimization of MG132 for proteasomal pathway inhibitor study in SH-SY5Y cells treated with a high dose of MG132 for 3 hours followed by 4O4HPR loaded HSANPs treatment; (n = 3), where n is number of experimental repeats.

### Supplementary Table

|       |                |                              |
|-------|----------------|------------------------------|
| GAPDH | Forward primer | 5`-GACTCATGACCACAGTCCATGC-3` |
|       | Reverse primer | 5`-AGAGGCAGGGATGATGTTCTG-3`  |
| PKC-δ | Forward primer | 5`-AAAGGCAGCTTCGGGAAGGT-3`   |
|       | Reverse primer | 5`-TGGATGTGGTACATCAGGTC-3`   |
| EzH2  | Forward primer | 5`-GCCAGACTGGGAAGAAATCTG-3`  |
|       | Reverse primer | 5`-TGTGCTGGAAAATCCAAGTCA-3`  |

**Supplementary Table 1.** List of primers used for quantitative PCR analysis.
